# Supplementary material
Source: publisher figshare collection journal article supplement (https://acs.figshare.com/ndownloader/files/28532227)
Supplement: Supplementary file 1 [file 28532227]

## Sheet: Beach Water Samples
ID	Zone	Date	Latitude	Longitude	Depth (cm)	Salinity	EC (mS/cm)	DO (beaker) (mmol/L)	DO (flow cell) (mmol/L)	pH	d18O (‰ VSMOW)	d18O 1s.d.	d2H (‰ VSMOW)	d2H 1s.d.	NOx (µmol/L)	± NOx	NO3 (µmol/L)	NO2 (µmol/L)	± NO2	NH4 (µmol/L)	± NH4	NO3:NH4	DOC (µmol/L)	± DOC	PO4(µmol/L)	± PO4	DSi (µmol/L)	± DSi	d15N-NO3 (‰)	d15N-NO3 StdDev	d18O-NO3 (‰)	d18O-NO3 StdDev	Total Alkalinity (ueqv/L)	Ca (µmol/L)	Fe (µmol/L)	K (µmol/L)	Mg (µmol/L)	Mn (µmol/L)	S (µmol/L)	Sr (µmol/L)
IND-19.1	Beach Groundwater	2018-11-06	8.73715	76.702	70	7.1	13.62		0.09	7.51	-2.84	0.04	-12.38	0.09	550.31	1.71	550.04	0.27	0.2	0.22	0.64	2492	196.59	32.29	1.44	0.15	49.6	1.14	16.66	0	7.68	0.16	6232	3387	2.17	2594	12009	3.68	6309	4.53
IND-19.2	Beach Groundwater	2018-11-06	8.73715	76.702	115	6.5	12.51		0.02	7.72	-2.58	0.1	-12.14	0.2	652.48	1.73	651.62	0.86	0.2	0.31	0.64	2092	89.05	32.62	1.22	0.15	40.24	1.13	16.65	0.26	8.69	0.78	5757	3479	0.36	2528	10971	2.94	6006	4.39
IND-19.3	Beach Groundwater	2018-11-06	8.73715	76.702	50	6.1	11.9		0.14	7.67	-2.64	0.08	-11.72	0.25	604.98	1.72	604.83	0.15	0.21	0.19	0.64	3105	93.87	32.65	1.56	0.15	48.79	1.14	17.63	0.04	9.53	0.5	5890	3469	1.45	2422	10866	3.31	5847	4.24
IND-19.4	Beach Groundwater	2018-11-06	8.73715	76.702	145	4.7	9.41		0.01	7.87	-2.94	0.02	-13.46	0.17	209.33	1.74	208.54	0.79	0.2	3.45	0.62	60	69.4	32.74	1.39	0.15	42.89	1.13	26.16	0.05	13.86	0	5836	2827	1.81	2045	8580	3.31	4882	3.5
IND-20	Beach Groundwater	2018-11-06	8.73718	76.702	160	3.7	7.44		0	7.68	-3.16	0.05	-14.31	0.32	105.34	1.9	101.13	4.21	0.2	40.77	1.1	2	241.05	52.78	0.69	0.15	87.68	1.3	32.8	0.05	19.53	0.18	4783	3170	5.06	1802	6391	2.94	4097	3.07
IND-21.1	Beach Groundwater	2018-11-06	8.73711	76.702	70	6.3	12.23			8.06	-2.79	0.05	-12.99	0.16	9.37	0.14	8.71	0.67	0.2	28.56	0.84	0	101.54	32.62	2.04	0.14	27.78	1.13	40.87	1.43	20.83	0.01	5669	2010	0.36	2943	10016	2.94	6729	2.84
IND-21.2	Beach Groundwater	2018-11-06	8.73711	76.702	110	13	23.9		0.01	7.87	-2.19	0.03	-9.63	0.08	176.63	1.75	173.45	3.18	0.19	4.98	0.61	35	95.99	32.64	1.6	0.15	27.85	1.13	25.74	0.27	12.42	0.27	4975	4163	0	4619	19873	1.47	11895	32.33
IND-21.3	Beach Groundwater	2018-11-06	8.73711	76.702	40	24.6	42.5	0.05		7.77	-0.8	0.04	-5	0.1	115.45	1.77	114.84	0.62	0.2	1.32	0.63	87	93.27	32.65	1.59	0.15	22.9	1.13	13.2	0.08	2.01	0.17	3922	7945	0	7080	37260	1.85	20317	63.13
IND-21.4	Beach Groundwater	2018-11-06	8.73711	76.702	90	6.8	13.11	0.04		7.95	-2.59	0.06	-12.07	0.26	41.14	1.7	35.63	5.51	0.21	10.92	0.61	3	82.7	32.69	1.83	0.14	28.21	1.13	89.12	0.72	38.06	0.3	5832	3072	1.09	2600	12359	3.31	6617	4.15
IND-22.1	Freshwater Discharge Tube	2018-11-06	8.73703	76.702	30	0.1	0.12	0.05		7.28	-3.72	0.05	-17.05	0.06	409.81	1.7	403.73	6.08	0.21	26.24	0.79	15	68.56	32.74	0.3	0.15	135.76	1.66	13.78	0.45	10.1	0.21	2306	3354	0	138	159	1.11	349	7.79
IND-22.2	Freshwater Discharge Tube	2018-11-06	8.73703	76.702	70	0.4	0.82	0.06		6.99	-3.75	0.04	-17.21	0.14	427	1.7	423.37	3.64	0.19	23.06	0.74	18	37.65	32.87	0.37	0.15	132.78	1.64	12.73	0.01	8.7	0.31	1802	3202	0	96	0	1.11	249	6.95
IND-22.3	Upper Saline Plume	2018-11-06	8.73703	76.702	10	32.1	54.1	0.07		7.71	0.31	0.04	3.11	0.1	14.87	2.05	12.13	2.74	0.19	4.37	0.61	3	85.29	32.68	0.8	0.15	25.75	1.13	20.86	0.04	15.86	0.09	2360	10516	0	9655	48926	1.48	27378	87.38
IND-22.4	Upper Saline Plume	2018-11-06	8.73703	76.702	20	31.2	52.7	0.06		7.69	-0.08	0.06	1.3	0.15	13.08	2.05	11.74	1.34	0.2	0.36	0.64	32	67.07	32.75	1.05	0.15	24	1.13	19.84	0.21	10.81	0.19	2554	9921	0	8874	45671	1.49	25304	77.11
IND-22.5	Freshwater Discharge Tube	2018-11-06	8.73703	76.702	40	8.8	16.63	0.05		7.32	-2.74	0.1	-12.06	0.16	243.92	1.73	238.93	4.98	0.2	16.78	0.65	14	44.42	32.84	1.31	0.15	103.23	1.4	19.18	0.02	13.57	0.06	5843	4927	0	2456	12101	2.24	7012	21.82
IND-22.6	Freshwater Discharge Tube	2018-11-06	8.73703	76.702	50	0.1	0.19	0.04		7.3	-3.63	0.07	-17.14	0.14	387.79	1.7	372.38	15.41	0.4	33.07	0.93	11	62.95	32.76	0.69	0.15	139.66	1.7	16.78	0.23	12.02	0.03	2160	3346	0	251	912	1.12	583	9.21
IND-23.1	Freshwater Discharge Tube	2018-11-06	8.73699	76.702	110	0	0.1	0.05		7.51	-3.77	0.04	-17.03	0.05	232.85	2.04	186	46.85	0.31	12.82	0.62	15	67.43	32.75	0.27	0.15	140.75	0.41	42.08	0.16	31.82	0.16	2850	3007	0	116	318	1.12	283	7.07
IND-23.2	Freshwater Discharge Tube	2018-11-06	8.73699	76.702	10	28.1	48	0.04		7.65	-0.24	0.1	1.31	0.3	6.16	2.09	4.37	1.79	0.19	20.87	0.71	0	89.26	32.66	0.9	0.15	49.83	0.63	38.61	0.65	28.89	1.04	3422	9859	0	8314	42995	1.49	23752	73.91
IND-23.3	Freshwater Discharge Tube	2018-11-06	8.73699	76.702	20	15.2	27.5	0.05		7.37	-1.52	0.06	-6.55	0.26	71.58	2.3	62.19	9.39	0.27	63.25	1.66	1	94.47	32.64	1.14	0.15	82.18	0.7	33.22	0.05	23.03	0.2	5651	10308	0	3897	24675	2.23	13683	48.18
IND-23.4	Freshwater Discharge Tube	2018-11-06	8.73699	76.702	30	1.4	2.95	0.04		7.41	-3.49	0.08	-16.01	0.25	380.84	2.09	372.18	8.66	0.25	73.97	1.94	5	63.82	32.76	1.32	0.15	143.09	0.41	19.93	0.08	14.95	0.07	4761	5707	0	158	914	1.11	707	16.71
IND-23.5	Freshwater Discharge Tube	2018-11-06	8.73699	76.702	40	11.1	20.68	0.04		7.34	-2.37	0.04	-10.08	0.1	183.12	2.04	175.26	7.86	0.24	75.67	1.98	2	76.23	32.71	0.9	0.15	120.49	0.41	29.68	0.08	20.75	0.07	5708	9883	0	2455	16514	1.47	9204	39.3
IND-23.6	Freshwater Discharge Tube	2018-11-06	8.73699	76.702	50	0.1	0.15	0.04		7.46	-3.46	0.06	-16.2	0.13	347.19	1.71	329.94	17.25	0.44	13.76	0.63	24	66.69	32.75	0.4	0.15	134.38	0.41	20.98	0.04	15.26	0.07	3233	2625	0	277	1199	1.47	612	7.65
IND-23.7	Freshwater Discharge Tube	2018-11-06	8.73699	76.702	70	0.4	0.81	0.04		7.38	-3.72	0.06	-17.36	0.1	379.94	1.7	366.97	12.97	0.34	26.94	0.81	14	39.98	32.86	0.26	0.15	146.73	0.41	16.65	0.03	12.58	0.58		3232	0	113	152	1.1	264	7.47
IND-24.1	Upper Saline Plume	2018-11-08	8.73707	76.702	145	31.7	53.5		0.06	7.83	0.35	0.07	2.84	0.2	16.16	0.15	16.16	0		0			116.63	32.56	1.12	0.15	16.19	0.63	7.34	0.28	3.82	1.11	2173	10709	0	9703	48368	1.1	27112	82.67
IND-24.2	Upper Saline Plume	2018-11-08	8.73707	76.702	100	32.1	54.1		0.08	7.86	0.39	0.02	3.74	0.08	14.18	0.15	14.18	0		0			118.52	32.56	1.06	0.15	16	0.63	7.39	0.01	2.71	0.04	2197	11058	0	10016	46096	0	26065	82.07
IND-24.3	Upper Saline Plume	2018-11-08	8.73707	76.7019	80	31.5	53.2		0.13	7.25	0.46	0.08	3.38	0.26	14.65	0.15	14.5	0.16	0.21	0			86.8	32.67	0.95	0.15	14.21	0.63	7.66	0.22	2.51	0.22	2217	10060	0	9137	45998	1.46	26006	84.64
IND-24.4	Upper Saline Plume	2018-11-08	8.73707	76.7019	60	31.6	53.3		0.17	7.95	0.33	0.07	3.29	0.32	16.67	0.15	16.67	0		0			97.16	32.63	0.95	0.15	14.11	0.63	8.06	0.11	1.49	0.16	2278	10217	0	9261	47435	1.83	26640	83.58
IND-24.5	Upper Saline Plume	2018-11-08	8.73707	76.7019	70	31.4	53		0.16	7.96	0.4	0.05	3.7	0.1	14.84	0.15	14.84	0		0			96.03	32.64	0.93	0.15	14.39	0.63	8.07	0.13	1.9	0.05	2243	10073	0	9154	46012	1.47	25869	82.51
IND-24.6	Upper Saline Plume	2018-11-08	8.73707	76.702	90	31.5	53.2		0.1	7.51	0.41	0.05	3.32	0.15	14.85	0.15	14.85	0		3.81	0.62	4	271.84	32.16	1.16	0.15	14.71	0.63	7.44	0.23	2.77	0.23	2227	10047	0	9190	47416	2.2	26590	85.38
IND-25.1	Freshwater Discharge Tube	2018-11-08	8.73697	76.702	100	0.4	0.98			8.03	-3.3	0.06	-15.07	0.2	65.99	1.72	38.97	27.02	0.22	19.91	0.69	2			0.66	0.15			70.59	1.7	53.66	0.57		2430	0	776	4472	1.83	2011	13.03
IND-25.2	Freshwater Discharge Tube	2018-11-08	8.73697	76.702	10	4.3	8.64			7.34	-3.07	0.03	-14.3	0.2	352.05	1.71	339.04	13.02	0.34	32.46	0.91	10	84.99	32.68	0.78	0.15	127.03	0.41	16.15	0.12	11.63	0	4179	3928	0	1138	5897	1.46	3256	3.22
IND-25.3	Freshwater Discharge Tube	2018-11-08	8.73697	76.702	20	4.9	9.74			7.28	-2.83	0.06	-13.17	0.12	334.09	1.71	320.71	13.37	0.35	26.21	0.79	12	73.34	32.72	0.76	0.15	124.28	0.41	16.55	0.2	11.77	0.08		4711	0	1540	8334	1.46	4596	4.12
IND-25.4	Freshwater Discharge Tube	2018-11-08	8.73697	76.702	30	5.5	10.73			7.3	-3.38	0.08	-15.66	0.3	356.53	1.71	341.63	14.91	0.39	22.74	0.73	15	81.56	32.69	0.56	0.15	140.83	0.41	17.39	0.24	12.47	0.09	6389	3167	0	624	3009	1.09	1675	2.1
IND-25.5	Freshwater Discharge Tube	2018-11-08	8.73697	76.702	40	4.4	8.85			7.26	-3.18	0.07	-14.16	0.13	266.12	1.72	254.99	11.13	0.3	20.48	0.7	12	54.06	32.8	0.55	0.15	132.03	0.41	17.69	0.02	12.57	0.04		4093	0	1264	6507	1.45	3593	3.32
IND-25.6	Freshwater Discharge Tube	2018-11-08	8.73697	76.702	50	2.3	4.85			8.08	-3.37	0.11	-15.26	0.31	157.12	1.75	152.16	4.95	0.2	79.45	2.08	2	629.45	32.23	1.33	0.15	59.29	0.64	31.47	0.34	23.13	0.08	8519	1412	1.09	1082	3183	2.94	3651	1.41
IND-26.1	Upper Saline Plume	2018-11-08	8.73703	76.7019	110	31.6	53.3		0.14	7.92	0.34	0.06	3.48	0.15	19.59	0.15	19.59	0		0			128.93	53.02	1.05	0.15	16.5	0.63	8.11	0.01	1.41	0.11	2281	10360	0.36	9409	49163	2.94	26155	87.13
IND-26.2	Upper Saline Plume	2018-11-08	8.73703	76.7019	90	31.6	53.3		0.16	6.65	0.57	0.04	3.73	0.07	23.09	1.73	23.09	0		0.66	0.64	35	96.05	53.1	1.01	0.15	17.04	0.63	7.86	0.23	0.99	0.15	2350	12446	0	11277	50123	0	27442	90.84
IND-26.3	Upper Saline Plume	2018-11-08	8.73703	76.702	70	32	53.9		0.1	7.85	0.6	0.03	4.23	0.11	23.72	1.73	22.85	0.87	0.2	0			92.66	53.11	0.98	0.15	16.86	0.63	7.99	0.15	0.73	0.33	2397	10764	1.81	9798	52393	3.31	27985	88.93
IND-26.4	Upper Saline Plume	2018-11-08	8.73703	76.7019	50	31.9	53.8	0.18			0.56	0.06	4.12	0.17	11.98	0.14	11.98	0		0			91.03	53.12	0.9	0.15	17.83	0.63	9.87	0.14	3.45	0.2	2285	10580	1.45	9640	50910	3.31	27220	87.01
IND-26.5	Upper Saline Plume	2018-11-08	8.73703	76.7019	40	32.1	54	0.23		8.02	0.53	0.08	4.34	0.2	6.69	0.14	6.41	0.28	0.2	1.48	0.63	4	122.53	53.04	0.89	0.15	12.37	0.63	10.26	0.02	4.67	0.22	2308	11095	0.72	10157	52131	3.31	28118	187.43
IND-26.6	Upper Saline Plume	2018-11-08	8.73703	76.7019	30	32.2	54.2	0.2		7.91	0.56	0.04	4.36	0.13	9.63	0.14	9.37	0.26	0.2	0.82	0.64	11	109.27	53.07	1.02	0.15	16.52	0.63	9.06	0.13	1.89	0.29	2246	10971	0	9953	50121	2.57	26885	86.46
IND-26.7	Upper Saline Plume	2018-11-08	8.73703	76.7019	20	32.1	54	0.22		8.02	0.51	0.07	4.08	0.15	5.95	0.14	5.69	0.26	0.2	1.31	0.63	4	89.29	53.12	0.98	0.15	12.13	0.64	10.31	0.26	4.59	0.45	2278	10868	0.36	10015	52185	2.94	27811	95.16
IND-26.8	Upper Saline Plume	2018-11-08	8.73703	76.7019	10	32.2	54.2	0.23		8.09	0.53	0.05	3.92	0.29	3.87	0.15	3.54	0.33	0.2	1.52	0.63	2	139.5	52.99	1	0.15	11.12	0.64						10806	0.72	9977	51884	3.31	27824	87.2
IND-27.1	Freshwater Discharge Tube	2018-11-08	8.73696	76.702	50	17.3	31	0.05		7.41	-1.44	0.06	-6.06	0.1	37.01	1.71	31.61	5.39	0.21	25.16	0.77	1	121.08	53.04	1.8	0.14	41.54	0.62	36.33	0.28	25.03	0.06	4613	6499	1.81	5570	29227	4.04	15669	48.4
IND-27.2	Freshwater Discharge Tube	2018-11-08	8.73696	76.702	40	19	33.7	0.06		7.64	-1.05	0.04	-4.08	0.18	39.28	1.7	36.81	2.47	0.19	14.95	0.64	2	89.37	53.12	1.58	0.15	43.28	0.62	31.07	0.35	21.19	0.34	4457	7439	1.81	6082	32597	4.04	17225	54.39
IND-27.3	Freshwater Discharge Tube	2018-11-08	8.73696	76.702	30	21.5	37.7	0.06		7.7	-0.79	0.08	-2.95	0.31	41.66	1.7	38.93	2.73	0.19	12.25	0.62	3	129.18	53.02	2.03	0.14	44.06	0.62	33.32	0.23	22.6	0.24	4233	8183	0.36	6693	35377	3.31	18692	61.2
IND-27.4	Freshwater Discharge Tube	2018-11-08	8.73696	76.702	20	21.9	38.4	0.06		7.71	-0.84	0.08	-2.86	0.13	44.28	1.7	40.62	3.66	0.19	11.25	0.61	4	123.38	27.6	2.32	0.14	44.48	0.62	31.32	0.29	21.67	0	4253	10536	2.17	10324	52040	4.41	24621	77.64
IND-27.5	Freshwater Discharge Tube	2018-11-08	8.73696	76.702	10	21.7	38	0.05		7.7	-0.8	0.05	-2.7	0.23	46.28	1.7	42.09	4.19	0.2	10.9	0.61	4	102.97	27.7	2.7	0.14	43.68	0.62	32.01	0.11	21.75	0.44	4223	8575	0	6768	36353	3.68	19008	65.33
IND-27.6	Freshwater Discharge Tube	2018-11-08	8.73696	76.702	70	22.3	39	0.04		7.6	-0.9	0.08	-3.21	0.14	0.01	0.15	0.01	0		45.53	1.21	0	127.07	27.58	1.27	0.15	40.16	0.62					4415	8432	8.32	7259	35757	3.68	19236	129.17
IND-28.1	Upper Saline Plume	2018-11-08	8.73701	76.702	10	32.2	54.2	0.08		7.84	0.51	0.04	4.14	0.17	8.37	0.14	5.56	2.81	0.19	6.52	0.61	1	130.94	27.57	0.81	0.15	18.76	1.14	32.06	0.1	27.06	0.2	2316	10713	0	9807	49999	2.57	27133	86.73
IND-28.2	Upper Saline Plume	2018-11-08	8.73701	76.702	20	32.3	54.4	0.07		7.82	0.48	0.06	3.68	0.14	12.35	0.14	9.3	3.05	0.19	3.99	0.62	2	116.45	27.64	0.85	0.15	18.94	1.14	25.13	0.55	17.78	0.27	2325	11282	0	10312	50308	1.84	27173	87.51
IND-28.3	Upper Saline Plume	2018-11-08	8.73701	76.702	30	32.3	54.3	0.09		7.81	0.46	0.02	3.4	0.09	19.43	0.15	19.43	0		0			76.91	27.83	0.8	0.15	19.25	1.14	8.47	0.2	2.52	0.07	2275	11011	0	10053	50033	2.57	27153	86.43
IND-28.4	Upper Saline Plume	2018-11-08	8.73701	76.702	40	32.3	54.3	0.09		7.82	0.64	0.02	4.25	0.1	17.98	0.15	17.98	0		0			89.15	27.77	0.84	0.15	18.5	1.14	8.22	0.14	3.98	0.08	2292	10822	0.36	9970	51059	2.94	27244	89.05
IND-28.5	Upper Saline Plume	2018-11-08	8.73701	76.702	50	32.3	54.3	0.09		7.82	0.44	0.09	3.87	0.14	17.44	0.15	17.44	0		0			115.22	27.64	0.68	0.15	18.45	1.14	8.12	0	4.01	0.21	2281	10793	1.09	9857	51402	3.31	27664	87.28
IND-28.6	Freshwater Discharge Tube	2018-11-08	8.73701	76.702	120	16.9	30.3	0.04		7.65	-1.51	0.1	-6.28	0.25	129.81	1.76	124.67	5.14	0.2	4.67	0.61	27	55.42	27.95	1.65	0.15	58.46	1.16	27.17	0.06	18.53	0.11	4842	7483	1.09	5138	28076	3.68	14744	50.06
IND-28.7	Freshwater Discharge Tube	2018-11-08	8.73701	76.702	100	19.5	34.5	0.04		7.66	-1.09	0.05	-4.05	0.22	98.29	1.86	92.24	6.05	0.21	1.96	0.63	47	60.34	27.92	1.64	0.15	49.51	1.14	28.75	0.16	20.39	0.25	4299	7828	2.89	6113	33759	4.04	17616	54.77
IND-28.8	Upper Saline Plume	2018-11-08	8.73701	76.702	80	32.1	54	0.05		7.81	0.48	0.03	3.78	0.1	21.31	1.74	18.19	3.12	0.19	0			104.15	27.7	1.34	0.15	19.97	1.14	21.49	0.17	14.11	0.15	2353	10716	0.36	9781	50407	3.31	27130	85.99
IND-28.9	Freshwater Discharge Tube	2018-11-08	8.73701	76.702	90	27.6	47.2	0.09		7.75	-0.1	0.06	0.98	0.14	29.14	1.72	24.36	4.78	0.2	1.98	0.63	12	102.65	27.7	1.6	0.15	30.94	1.13	41.82	0.28	25.84	0.46	3098	9513	2.17	8383	44674	3.68	23611	74.91
IND-35	Freshwater Discharge Tube	2018-11-14	8.73698	76.702	170	20.9	36.8	0.04		7.46	-1.06	0.01	-4.01	0.03	0.35	0.15	0.35	0		46.63	1.24	0	106.12	32.6	1.3	0.15	62.52	1.18					4482	7805	1.45	6270	35094	5.15	18150	60.05
IND-35.2	Freshwater Discharge Tube	2018-11-14	8.73698	76.702	50	24.7	42.8	0.04		7.57	-0.22	0.05	0.01	0.13	81.43	1.77	77.82	3.62	0.19	5.69	0.61	14	89.73	32.66	1.41	0.15	37.85	1.13	25.83	0.16	17.24	0.18	1492	8881	2.89	7375	40260	3.68	21369	68.56
IND-36	Freshwater Discharge Tube	2018-11-14	8.73704	76.702	140	8.8	16.67		0.02	7.76	-2.59	0.06	-11.6	0.12	21.99	0.16	12.83	9.17	0.26	24.07	0.75	1	49.95	32.82	1.75	0.14	69.49	1.2	35.34	0.03	21.55	0.06	6299	5212	0	2589	13668	2.94	7086	28.18
IND-36.2	Upper Saline Plume	2018-11-14	8.73704	76.702	50	32.4	54.5		0.1	7.86	0.71	0.09	4.79	0.3	21.36	0.16	21.36	0		2.49	0.62	9	83.26	32.68	0.9	0.15	16.54	1.15	9.36	0.13	3.2	0.39	2386	10689	1.09	9741	50580	3.31	27269	85.75
IND-36.3	Upper Saline Plume	2018-11-14	8.73704	76.702	90	32.5	54.6			7.91	0.41	0.04	4	0.17	21.08	0.16	21.08	0		1.06	0.64	20	99.76	32.62	1.01	0.15	18.75	1.14	9.31	0.13	2.78	0.17	2359	10594	1.45	9709	50215	3.31	27149	85.5
IND-37.1	Freshwater Discharge Tube	2018-11-15	8.73698	76.702	100	17.8	31.7	0.06		7.78	-1.33	0.08	-5.59	0.1	16.5	0.15	15.59	0.91	0.2	41.59	1.12	0	95.8	32.64	2.64	0.14	44.97	1.13	35.39	0.06	23.45	0.19	5103	7232	2.17	5106	29670	3.68	14927	51.2
IND-37.2	Freshwater Discharge Tube	2018-11-15	8.73698	76.702	150	2.5	5.21	0.05		8.18	-3.43	0.06	-15.87	0.15	0.01	0.15	0.01	0		60.56	1.59	0	109.9	32.59	3.04	0.14	56.94	1.16					7172	935	0	1189	3803	2.19	2622	2.74
IND-37.3	Freshwater Discharge Tube	2018-11-15	8.73698	76.702	200	16	28.8			7.49	-1.56	0.03	-6.45	0.15	0.05	0.15	0.05	0		428.67	3.02	0	104.35	32.61	4.24	0.14	130.81	1.13					4469	6853	108.88	5404	25222	4.78	13581	56.11
IND-PZ1.2	Beach Groundwater	2018-11-13	8.73722	76.702	190	1.1	2.3		0.02	7.48	-3.31	0.04	-14.88	0.16	254.46	1.72	232.47	21.99	0.21	1.37	0.63	169	209.26	27.23	0.38	0.15	131.63	1.13	22.1	0.21	15.49	0.18	5074	1974	0	418	1070	1.84	900	2.29
IND-PZ2.1	Beach Groundwater	2018-11-13	8.73715	76.702	195	10.6	19.84		0.03	7.63	-2.41	0.07	-10.98	0.2	127.78	1.77	111.52	16.26	0.42	0			144.09	27.51	1.53	0.15	32.43	1.13	47.07	0.13	24.32	0.48	5588	4433	0	3397	16719	2.94	8903	30.59
IND-PZ3.1	Beach Groundwater	2018-11-13	8.73708	76.702	160	1.3	2.72		0.03	7.74	-3.52	0.03	-16.3	0.11	328.31	1.71	322.26	6.05	0.21	9.22	0.61	35	123.26	27.6	0.37	0.15	82.68	1.15	20.37	0.28	14.54	0.15		2246	0	465	2451	1.48	1085	6.64
IND-PZ3.2	Beach Groundwater	2018-11-13	8.73708	76.702	190	1.8	3.74		0.02	7.18	-3.43	0.09	-15.78	0.05	386.73	1.7	383.82	2.92	0.19	11.42	0.61	34	72.96	27.85	0.3	0.15	144.07	1.13	12.48	0.32	9.26	0.42		3245	0	492	2212	1.49	1327	6.88
IND-PZ3.3	Beach Groundwater	2018-11-13	8.73708	76.702	270	1.7	3.59		0.02	7.25	-3.36	0.05	-15.62	0.17	381.29	1.7	376.61	4.68	0.2	4.89	0.61	77	147.65	27.49	0.42	0.15	144.32	1.13	13.81	0.05	10.56	0.38		3120	0	521	2319	1.86	1315	9.75
IND-PZ3.4	Beach Groundwater	2018-11-13	8.73708	76.702	350	6	11.66		0.03	7.6	-2.91	0.06	-12.92	0.06	78.03	1.76	72.67	5.37	0.21	23.72	0.75	3	92.03	27.76	1.27	0.15	71.43	1.21	37.53	0.03	24.19	0.31		3132	5.49	1926	9881	1.86	5282	18.77
29	River	2018-11-09	8.7331	76.7058	0	0.1	0.23	0.15		6.8	-3.46	0.07	-16.74	0.08	113.38	1.77	111.89	1.49	0.2	16.23	0.65	7	412.77	32.02	0.13	0.15	136.54	1.13	14.53	0.13	9.27	0.3	655	376	3.96	121	0	2.2	278	0
30.1	Coastal Spring Water	2018-11-09	8.73535	76.704	0	0.1	0.26	0.11		4.27	-3.44	0.04	-16.18	0.08	356.2	1.71	356.2	0		2.98	0.62	119	239.64	32.21	0		121.81	1.13	9.17	0.07	6.74	0.03	0	80	0	37	97	0.79	69	0.05
30.2	Coastal Spring Water	2018-11-09	8.73528	76.7041	0	0.1	0.19	0.1		4.42	-3.36	0.09	-16.03	0.25	306.63	1.71	306.63	0		0.62	0.64	492	196.43	32.31	0		117.96	1.13	8.85	0.1	7.03	0.23	0	89	0	40	66	0.64	65	0.02
30.3	Coastal Spring Water	2018-11-09	8.73525	76.7041	0	0.1	0.19	0.09		4.47	-3.75	0.05	-17.49	0.21	392.32	1.7	392.32	0		6.5	0.61	60	131.53	32.5	0.08	0	121.89	1.13	10.01	0.19	7.37	0.55	0	64	0	33	70	0.88	24	0
30.4	Coastal Spring Water	2018-11-09	8.73542	76.7039	0	0.1	0.18	0.17		4.56	-3.77	0.04	-17.31	0.1	309.57	1.71	309.57	0		2.13	0.63	146	129.8	32.51	0		125.74	1.13	10.05	0.16	7.25	0.1	0	64	0	46	67	0.82	27	0
31.1	Coastal Spring Water	2018-11-09	8.73778	76.7012	0	0.1	0.23	0.09		5.55	-3.42	0.03	-15.32	0.1	437.94	1.7	437.56	0.38	0.2	174.86	1.17	3	167.06	32.39	0		112.23	1.13	10.47		7.07		207	222	0.04	70	105	2.77	79	0.37
31.2	Coastal Spring Water	2018-11-09	8.73772	76.7014	0	0.1	0.3	0.09		5.51	-3.48	0.03	-15.31	0.07	621.17	1.72	620.77	0.4	0.2	203.02	1.34	3	268.2	32.16	0.12	0	124.92	1.13	8.35	0.01	6.53	0.07	345	369	0	64	111	2.32	103	0.73
Seawater	Sea	2018-11-09	8.73659	76.7015	0	34					0.58	0.04	4.18	0.26	1.46	0.56	1.21	0.25	0.09	0.75	0.31	2			0.22	0.15	6.22
IND-PW1.1	Upper Saline Plume	2018-11-07	8.73696	76.702	1	34									2.26	0.15	1.47	0.79	0.2	3.16	0.62	0			0.68	0.15	8.31	0.64
IND-PW1.3	Freshwater Discharge Tube	2018-11-07	8.73696	76.702	3	29									11.51	0.14	11.08	0.42	0.2	3.42	0.62	3			0.62	0.15	15.8	0.63
IND-PW1.5	Freshwater Discharge Tube	2018-11-07	8.73696	76.702	5	21									137.66	1.76	134.19	3.47	0.19	14.59	0.63	9			1.16	0.15	41.95	0.62
IND-PW1.7	Freshwater Discharge Tube	2018-11-07	8.73696	76.702	7	9									292.47	1.71	292.47	0		27.39	0.81	11			0.89	0.15	75.29	0.68
IND-PW1.9	Freshwater Discharge Tube	2018-11-07	8.73696	76.702	9	10									335.82	1.71	335.82	0		23.01	0.74	15			1.6	0.15	99.74	0.41
IND-PW1.11	Freshwater Discharge Tube	2018-11-07	8.73696	76.702	11	0									394.25	1.7	394.25	0		24.92	0.77	16			0.43	0.15	117.02	0.41
IND-PW1.12	Freshwater Discharge Tube	2018-11-07	8.73696	76.702	12	0									377.82	1.7	377.82	0		28.66	0.84	13			0.36	0.15	116.13	0.41
IND-PW1.13	Freshwater Discharge Tube	2018-11-07	8.73696	76.702	13	1									370.07	1.7	370.07	0		28.55	0.84	13			0.29	0.15	120.41	0.41
IND-PW2.1	Freshwater Discharge Tube	2018-11-09	8.73696	76.702	12	5									291.46	1.72	291.46	0		53.78	1.41	5			0.97	0.15	140.59	0.41
IND-PW2.2	Freshwater Discharge Tube	2018-11-09	8.73696	76.702	8	8									266.03	1.72	266.03	0		57.11	1.5	5			0.78	0.15	132.76	0.41
IND-PW2.3	Freshwater Discharge Tube	2018-11-09	8.73696	76.702	6	13									235.15	1.73	235.15	0		54.35	1.43	4			1.01	0.15	121.86	0.41
IND-PW2.4	Freshwater Discharge Tube	2018-11-09	8.73696	76.702	4	29									31.05	1.72	30.28	0.77	0.2	10.96	0.61	3			0.93	0.15	23.07	0.62
IND-PW2.5	Upper Saline Plume	2018-11-09	8.73696	76.702	5	30									36.06	1.71	35.13	0.94	0.2	12.13	0.62	3			1.09	0.15	24.78	0.62
IND-PW2.6	Upper Saline Plume	2018-11-09	8.73696	76.702	2	33									19.04	0.15	18.42	0.62	0.2	6.48	0.61	3			0.76	0.15	13.38	0.63
IND-PW3.1	Freshwater Discharge Tube	2018-11-09	8.73696	76.702	10	0									285.44	1.72	285.44	0		18.45	0.67	15			0.3	0.15	124.2	0.41
IND-PW3.2	Freshwater Discharge Tube	2018-11-09	8.73696	76.702	8	4									285.68	1.72	285.68	0		16.39	0.65	17			0.35	0.15	113.71	0.41
IND-PW3.3	Freshwater Discharge Tube	2018-11-09	8.73696	76.702	6	0									278.07	1.72	278.07	0		23.04	0.74	12			0.51	0.15	112.82	0.41
IND-PW3.4	Freshwater Discharge Tube	2018-11-09	8.73696	76.702	5	6									275.18	1.72	275.18	0		15	0.64	18			0.21	0.15	119.2	0.41
IND-PW3.5	Freshwater Discharge Tube	2018-11-09	8.73696	76.702	4	5									268.48	1.72	268.48	0		18.54	0.67	14			0.4	0.15	107.09	0.41
IND-PW3.6	Freshwater Discharge Tube	2018-11-09	8.73696	76.702	3	0									256.78	1.72	256.78	0		24.53	0.76	10			0.83	0.15	110.96	0.41
IND-PW3.7	Freshwater Discharge Tube	2018-11-09	8.73696	76.702	2	2									226.33	1.73	226.33	0		22.57	0.73	10			0.84	0.15	81.92	0.69
IND-PW4.1	Freshwater Discharge Tube	2018-11-09	8.73696	76.702	15	6									299.74	1.71	299.74	0		24.63	0.76	12			1.06	0.15	111.61	0.41
IND-PW4.2	Freshwater Discharge Tube	2018-11-09	8.73696	76.702	13	9									273.97	1.72	273.97	0		22.82	0.73	12			1.08	0.15	113.71	0.41
IND-PW4.3	Freshwater Discharge Tube	2018-11-09	8.73696	76.702	11	11									267.52	1.72	267.52	0		30.92	0.88	9			1.76	0.14	111.29	0.41
IND-PW4.4	Freshwater Discharge Tube	2018-11-09	8.73696	76.702	9	11									277.06	1.72	277.06	0		32.35	0.91	9			2.77	0.14	106.28	0.41
IND-PW4.5	Freshwater Discharge Tube	2018-11-09	8.73696	76.702	7	8									295.41	1.71	295.41	0		28.12	0.83	11			1.03	0.15	112.74	0.41
IND-PW4.6	Freshwater Discharge Tube	2018-11-09	8.73696	76.702	5	10									156.59	1.75	156.59	0		25.75	0.78	6			1.01	0.15	107.57	0.41
IND-PW4.7	Freshwater Discharge Tube	2018-11-09	8.73696	76.702	3	20									111.94	1.77	111.94	0		25.45	0.78	4			0.91	0.15	51.68	0.63
IND-PW4.8	Upper Saline Plume	2018-11-09	8.73696	76.702	2	33									11.92	0.14	11.41	0.51	0.2	4.14	0.61	3			1.54	0.15	13.1	0.63
IND-PW4.9	Upper Saline Plume	2018-11-09	8.73696	76.702	1	34									31.37	1.71	30.73	0.64	0.2	3.37	0.62	9			2.87	0.14	11.1	0.64
IND-PW5.1	Freshwater Discharge Tube	2018-11-09	8.73696	76.702	18	5									294.73	1.71	294.73	0		23.41	0.74	13			1.17	0.15	105.55	0.41
IND-PW5.2	Freshwater Discharge Tube	2018-11-09	8.73696	76.702	16	5									259.96	1.72	259.96	0		30.08	0.87	9			0.92	0.15	103.29	0.41
IND-PW5.3	Freshwater Discharge Tube	2018-11-09	8.73696	76.702	14	10									258.8	1.72	258.8	0		21.27	0.71	12			1.14	0.15	92.8	0.41
IND-PW5.4	Freshwater Discharge Tube	2018-11-09	8.73696	76.702	10	8									242.47	1.73	242.47	0		31.63	0.9	8			1.22	0.15	79.18	0.69
IND-PW5.5	Freshwater Discharge Tube	2018-11-09	8.73696	76.702	8	9									101.16	1.87	101.16	0		38.4	1.04	3			1.39	0.15	75.71	0.68
IND-PW5.6	Freshwater Discharge Tube	2018-11-09	8.73696	76.702	4	25									36.28	1.71	36.28	0		17.64	0.66	2			1.25	0.15	34.08	0.62
IND-PW5.7	Upper Saline Plume	2018-11-09	8.73696	76.702	2	30									21.33	0.16	19.01	2.32	0.19	6.72	0.61	3			0.96	0.15	19.22	0.63
IND-PW6.1	Upper Saline Plume	2018-11-09	8.73696	76.702	14	32									19.41	0.15	17.88	1.53	0.2	4.06	0.62	4			1.47	0.15	38.06	0.62
IND-PW6.2	Upper Saline Plume	2018-11-09	8.73696	76.702	12	32									21.94	0.16	19.88	2.06	0.19	3.41	0.62	6			1.44	0.15	37.98	0.62
IND-PW6.3	Upper Saline Plume	2018-11-09	8.73696	76.702	10	33									28.12	1.72	26.11	2.01	0.19	3.49	0.62	7			1.27	0.15	34.89	0.62
IND-PW6.4	Upper Saline Plume	2018-11-09	8.73696	76.702	8	32									27.54	1.72	26.11	1.43	0.2	7.82	0.61	3			1.49	0.15	38.68	0.62
IND-PW6.5	Upper Saline Plume	2018-11-09	8.73696	76.702	6	31									2.69	0.15	2.26	0.43	0.2	6.13	0.61	0			1.14	0.15	29.25	0.62
IND-PW7.1	Upper Saline Plume	2018-11-09	8.73696	76.702	13	33									4.66	0.15	4.3	0.35	0.2	20.5	0.7	0			1.41	0.15	19.12	0.63
IND-PW7.2	Upper Saline Plume	2018-11-09	8.73696	76.702	11	33									5.95	0.14	5.62	0.33	0.2	21.75	0.72	0			1.06	0.15	21.83	0.62
IND-PW7.4	Upper Saline Plume	2018-11-09	8.73696	76.702	3	34									10.56	0.14	10.09	0.47	0.2	4.49	0.61	2			0.65	0.15	13.72	0.63
IND-PW7.5	Upper Saline Plume	2018-11-09	8.73696	76.702	1	34									0.73	0.15	0.73	0		5.41	0.61	0			1.02	0.15	20.03	0.63

## Sheet: Endmember for Darcy Flux
Sample ID	Zone	Salinity	NO3	NO2	NH4	PO4	DSi				Average	n
IND-PW1.3	Freshwater Discharge Tube	29	11.08	0.42	3.42	0.62	15.8			NO3	241.62	31
IND-PW1.5	Freshwater Discharge Tube	21	134.19	3.47	14.59	1.16	41.95			NO2	0.15
IND-PW1.7	Freshwater Discharge Tube	9	292.47	0	27.39	0.89	75.29			NH4	26.38
IND-PW1.9	Freshwater Discharge Tube	10	335.82	0	23.01	1.6	99.74			PO4	0.94
IND-PW1.11	Freshwater Discharge Tube	0	394.25	0	24.92	0.43	117.02			Dsi	96.13
IND-PW1.12	Freshwater Discharge Tube	0	377.82	0	28.66	0.36	116.13
IND-PW1.13	Freshwater Discharge Tube	1	370.07	0	28.55	0.29	120.41
IND-PW2.1	Freshwater Discharge Tube	5	291.46	0	53.78	0.97	140.59
IND-PW2.2	Freshwater Discharge Tube	8	266.03	0	57.11	0.78	132.76
IND-PW2.3	Freshwater Discharge Tube	13	235.15	0	54.35	1.01	121.86
IND-PW2.4	Freshwater Discharge Tube	29	30.28	0.77	10.96	0.93	23.07
IND-PW3.1	Freshwater Discharge Tube	0	285.44	0	18.45	0.3	124.2
IND-PW3.2	Freshwater Discharge Tube	4	285.68	0	16.39	0.35	113.71
IND-PW3.3	Freshwater Discharge Tube	0	278.07	0	23.04	0.51	112.82
IND-PW3.4	Freshwater Discharge Tube	6	275.18	0	15	0.21	119.2
IND-PW3.5	Freshwater Discharge Tube	5	268.48	0	18.54	0.4	107.09
IND-PW3.6	Freshwater Discharge Tube	0	256.78	0	24.53	0.83	110.96
IND-PW3.7	Freshwater Discharge Tube	2	226.33	0	22.57	0.84	81.92
IND-PW4.1	Freshwater Discharge Tube	6	299.74	0	24.63	1.06	111.61
IND-PW4.2	Freshwater Discharge Tube	9	273.97	0	22.82	1.08	113.71
IND-PW4.3	Freshwater Discharge Tube	11	267.52	0	30.92	1.76	111.29
IND-PW4.4	Freshwater Discharge Tube	11	277.06	0	32.35	2.77	106.28
IND-PW4.5	Freshwater Discharge Tube	8	295.41	0	28.12	1.03	112.74
IND-PW4.6	Freshwater Discharge Tube	10	156.59	0	25.75	1.01	107.57
IND-PW4.7	Freshwater Discharge Tube	20	111.94	0	25.45	0.91	51.68
IND-PW5.1	Freshwater Discharge Tube	5	294.73	0	23.41	1.17	105.55
IND-PW5.2	Freshwater Discharge Tube	5	259.96	0	30.08	0.92	103.29
IND-PW5.3	Freshwater Discharge Tube	10	258.8	0	21.27	1.14	92.8
IND-PW5.4	Freshwater Discharge Tube	8	242.47	0	31.63	1.22	79.18
IND-PW5.5	Freshwater Discharge Tube	9	101.16	0	38.4	1.39	75.71
IND-PW5.6	Freshwater Discharge Tube	25	36.28	0	17.64	1.25	34.08

## Sheet: NO3_removal Calc
ID	Zone	Groundwater fraction	NO3initial (µmol/L)	NO3*Mix (%)	Rayleigh Model NO3 removal (%)		Endmember				Statistics NO3 Removal	Beach Groundwater	stdev	Freshwater Discharge Tube	stdev
IND-19.1	Beach Groundwater	0.79	319.41	-72.21	21.92		Seawater Salinity	34			NO3*Mix	30.88	61.8921	56.735	37.1195
IND-19.2	Beach Groundwater	0.81	327.47	-98.99	21.9		Seawater Nitrate	1.21	µmol/L		Rayleigh	35.2773	24.9617	49.3501	19.4105
IND-19.3	Beach Groundwater	0.82	331.5	-82.45	24.49		Groundwater Nitrate	404	µmol/L
IND-19.4	Beach Groundwater	0.86	347.61	40.01	43.73		Groundwater 15N	9.48333	per mill
IND-20	Beach Groundwater	0.89	359.69	71.88	55.25		Enrichment Factor e	-29	after Wong et al. 2020
IND-21.1	Beach Groundwater	0.81	327.47	97.34	66.12
IND-21.2	Beach Groundwater	0.62	250.94	30.88	42.91
IND-21.3	Beach Groundwater	0.28	113.99	-0.75	12.03
IND-21.4	Beach Groundwater	0.8	323.44	88.98	93.58
IND-22.1	Freshwater Discharge Tube	1	404	0.07	13.77
IND-22.2	Freshwater Discharge Tube	0.99	399.97	-5.85	10.59
IND-22.3	Upper Saline Plume	0.06	25.38	52.21	32.45
IND-22.4	Upper Saline Plume	0.08	33.43	64.88	30.03
IND-22.5	Freshwater Discharge Tube	0.74	299.27	20.16	28.42
IND-22.6	Freshwater Discharge Tube	1	404	7.83	22.25
IND-23.1	Freshwater Discharge Tube	1	404	53.96	67.5
IND-23.2	Freshwater Discharge Tube	0.17	69.68	93.73	63.37
IND-23.3	Freshwater Discharge Tube	0.55	222.74	72.08	55.89
IND-23.4	Freshwater Discharge Tube	0.96	387.89	4.05	30.25
IND-23.5	Freshwater Discharge Tube	0.67	271.08	35.35	50.16
IND-23.6	Freshwater Discharge Tube	1	404	18.33	32.73
IND-23.7	Freshwater Discharge Tube	0.99	399.97	8.25	21.9
IND-24.1	Upper Saline Plume	0.07	29.41	45.05	-7.67
IND-24.2	Upper Saline Plume	0.06	25.38	44.13	-7.49
IND-24.3	Upper Saline Plume	0.07	29.41	50.7	-6.49
IND-24.4	Upper Saline Plume	0.07	29.41	43.32	-5.03
IND-24.5	Upper Saline Plume	0.08	33.43	55.61	-4.99
IND-24.6	Upper Saline Plume	0.07	29.41	49.51	-7.3
IND-25.1	Freshwater Discharge Tube	0.99	399.97	90.26	87.84
IND-25.2	Freshwater Discharge Tube	0.87	351.64	3.58	20.54
IND-25.3	Freshwater Discharge Tube	0.86	347.61	7.74	21.63
IND-25.4	Freshwater Discharge Tube	0.84	339.55	-0.61	23.86
IND-25.5	Freshwater Discharge Tube	0.87	351.64	27.49	24.65
IND-25.6	Freshwater Discharge Tube	0.93	375.8	59.51	53.15
IND-26.1	Upper Saline Plume	0.07	29.41	33.39	-4.85
IND-26.2	Upper Saline Plume	0.07	29.41	21.49	-5.76
IND-26.3	Upper Saline Plume	0.06	25.38	9.97	-5.28
IND-26.4	Upper Saline Plume	0.06	25.38	52.8	1.32
IND-26.5	Upper Saline Plume	0.06	25.38	74.74	2.64
IND-26.6	Upper Saline Plume	0.05	21.35	56.11	-1.47
IND-26.7	Upper Saline Plume	0.06	25.38	77.58	2.81
IND-26.8	Upper Saline Plume	0.05	21.35	83.42
IND-27.1	Freshwater Discharge Tube	0.49	198.58	84.08	60.3765
IND-27.2	Freshwater Discharge Tube	0.44	178.44	79.37	52.4965
IND-27.3	Freshwater Discharge Tube	0.37	150.24	74.09	56.0428
IND-27.4	Freshwater Discharge Tube	0.36	146.21	72.22	52.9043
IND-27.5	Freshwater Discharge Tube	0.36	146.21	71.21	54.0116
IND-27.6	Freshwater Discharge Tube	0.34	138.16	99.99
IND-28.1	Upper Saline Plume	0.05	21.35	73.96	54.0909
IND-28.2	Upper Saline Plume	0.05	21.35	56.44	41.6984
IND-28.3	Upper Saline Plume	0.05	21.35	8.99	-3.55602
IND-28.4	Upper Saline Plume	0.05	21.35	15.78	-4.4526
IND-28.5	Upper Saline Plume	0.05	21.35	18.31	-4.81341
IND-28.6	Freshwater Discharge Tube	0.5	202.61	38.47	45.6587
IND-28.7	Freshwater Discharge Tube	0.43	174.41	47.11	48.5401
IND-28.8	Upper Saline Plume	0.06	25.38	28.33	33.9014
IND-28.9	Freshwater Discharge Tube	0.19	77.74	68.66	67.2104
IND-35	Freshwater Discharge Tube	0.39	158.3	99.78
IND-35.2	Freshwater Discharge Tube	0.27	109.96	29.23	43.0888
IND-36	Freshwater Discharge Tube	0.74	299.27	95.71	59.0005
IND-36.2	Upper Saline Plume	0.05	21.35	-0.05	-0.426193
IND-36.3	Upper Saline Plume	0.04	17.32	-21.71	-0.599491
IND-37.1	Freshwater Discharge Tube	0.48	194.55	91.99	59.0711
IND-37.2	Freshwater Discharge Tube	0.93	375.8	100
IND-37.3	Freshwater Discharge Tube	0.53	214.69	99.98
IND-PZ1.2	Beach Groundwater	0.97	391.92	40.68	35.2773
IND-PZ2.1	Beach Groundwater	0.69	279.14	60.05	72.6401
IND-PZ3.1	Beach Groundwater	0.96	387.89	16.92	31.2987
IND-PZ3.2	Beach Groundwater	0.95	383.86	0.01	9.81737
IND-PZ3.3	Beach Groundwater	0.95	383.86	1.89	13.8599
IND-PZ3.4	Beach Groundwater	0.82	331.5	78.08	61.9826
29	River	1	404	72.3	15.9722
30.1	Coastal Spring Water	1	404	11.83	-1.08632
30.2	Coastal Spring Water	1	404	24.1	-2.20793
30.3	Coastal Spring Water	1	404	2.89	1.7997
30.4	Coastal Spring Water	1	404	23.37	1.93506
31.1	Coastal Spring Water	1	404	-8.31	3.34507
31.2	Coastal Spring Water	1	404	-53.66	-3.98541
Seawater	Sea	0	1.21	0
IND-PW1.1	Upper Saline Plume	0	1.21	-21.49
IND-PW1.3	Freshwater Discharge Tube	0.15	61.63	82.02
IND-PW1.5	Freshwater Discharge Tube	0.38	154.27	13.02
IND-PW1.7	Freshwater Discharge Tube	0.74	299.27	2.27
IND-PW1.9	Freshwater Discharge Tube	0.71	287.19	-16.93
IND-PW1.11	Freshwater Discharge Tube	1	404	2.41
IND-PW1.12	Freshwater Discharge Tube	1	404	6.48
IND-PW1.13	Freshwater Discharge Tube	0.97	391.92	5.58
IND-PW2.1	Freshwater Discharge Tube	0.85	343.58	15.17
IND-PW2.2	Freshwater Discharge Tube	0.76	307.33	13.44
IND-PW2.3	Freshwater Discharge Tube	0.62	250.94	6.29
IND-PW2.4	Freshwater Discharge Tube	0.15	61.63	50.87
IND-PW2.5	Upper Saline Plume	0.12	49.54	29.09
IND-PW2.6	Upper Saline Plume	0.03	13.29	-38.6
IND-PW3.1	Freshwater Discharge Tube	1	404	29.35
IND-PW3.2	Freshwater Discharge Tube	0.88	355.67	19.68
IND-PW3.3	Freshwater Discharge Tube	1	404	31.17
IND-PW3.4	Freshwater Discharge Tube	0.82	331.5	16.99
IND-PW3.5	Freshwater Discharge Tube	0.85	343.58	21.86
IND-PW3.6	Freshwater Discharge Tube	1	404	36.44
IND-PW3.7	Freshwater Discharge Tube	0.94	379.83	40.41
IND-PW4.1	Freshwater Discharge Tube	0.82	331.5	9.58
IND-PW4.2	Freshwater Discharge Tube	0.74	299.27	8.45
IND-PW4.3	Freshwater Discharge Tube	0.68	275.11	2.76
IND-PW4.4	Freshwater Discharge Tube	0.68	275.11	-0.71
IND-PW4.5	Freshwater Discharge Tube	0.76	307.33	3.88
IND-PW4.6	Freshwater Discharge Tube	0.71	287.19	45.48
IND-PW4.7	Freshwater Discharge Tube	0.41	166.35	32.71
IND-PW4.8	Upper Saline Plume	0.03	13.29	14.15
IND-PW4.9	Upper Saline Plume	0	1.21	-2439.67
IND-PW5.1	Freshwater Discharge Tube	0.85	343.58	14.22
IND-PW5.2	Freshwater Discharge Tube	0.85	343.58	24.34
IND-PW5.3	Freshwater Discharge Tube	0.71	287.19	9.89
IND-PW5.4	Freshwater Discharge Tube	0.76	307.33	21.1
IND-PW5.5	Freshwater Discharge Tube	0.74	299.27	66.2
IND-PW5.6	Freshwater Discharge Tube	0.26	105.94	65.75
IND-PW5.7	Upper Saline Plume	0.12	49.54	61.63
IND-PW6.1	Upper Saline Plume	0.06	25.38	29.55
IND-PW6.2	Upper Saline Plume	0.06	25.38	21.67
IND-PW6.3	Upper Saline Plume	0.03	13.29	-96.46
IND-PW6.4	Upper Saline Plume	0.06	25.38	-2.88
IND-PW6.5	Upper Saline Plume	0.09	37.46	93.97
IND-PW7.1	Upper Saline Plume	0.03	13.29	67.64
IND-PW7.2	Upper Saline Plume	0.03	13.29	57.71
IND-PW7.4	Upper Saline Plume	0	1.21	-733.88
IND-PW7.5	Upper Saline Plume	0	1.21	39.67

## Sheet: Incubations-DB
Sample	NOx [uM]	± NOx	NO3 [µM]	NO2 [uM]	± No2	NH4 [uM]	± NH4	PO4 [uM]	± PO4	DSi [uM]	± DSi	NO3:NH4	N/P	TIN/P	Salinity	Freshwater (L)	overl. Water (mL)	Zone	Date	Time	dTime [h]	Sample Nr	Area of Core (dm²)	Info
Inc1 1.1	1.84096	0.558615	1.72458	0.116379	0.085813	2.95803	0.305013	0.302174	0.145548	6.55678	1.01783	0.583016	9.78916	15.8815	32		420	Saline	2018-11-07	13:15:00	0	0	0.400751
Inc1 1.2	2.84071	0.55289	2.56033	0.280377	0.0851685	7.7669	0.297362	0.561301	0.144254	8.14452	1.01327	0.329647	13.8373	18.8983	33.5		420	Saline	2018-11-07	14:15:00	1	1	0.400751
Inc1 1.3	3.48158	0.549657	3.1725	0.309076	0.0850594	9.70463	0.298357	0.514187	0.14448	9.02109	1.01086	0.326906	18.8737	25.6448	32.2786		420	Saline	2018-11-07	15:20:00	2.08333	2	0.400751
Inc1 1.4	3.58839	0.549152	3.23011	0.358275	0.0848752	11.4651	0.301289	0.529892	0.144404	9.93073	1.00844	0.281734	21.6367	28.4087	32.0116		420	Saline	2018-11-07	16:20:00	3.16667	3	0.400751
Inc1 1.5	3.79774	0.54819	3.41486	0.382875	0.0847844	9.55103	0.298192	0.773314	0.143284	10.4104	1.0072	0.357539	12.3508	17.2618	32.0783		420	Saline	2018-11-07	17:15:00	4.08333	4	0.400751
Inc1 1.6	3.86183	0.547903	3.45025	0.411575	0.0846794	11.855	0.302195	0.718348	0.143528	11.2042	1.00519	0.291037	16.5032	21.8792	32.0783		420	Saline	2018-11-07	18:15:00	5.08333	5	0.400751
Inc1 1.7	4.17799	0.546539	3.73361	0.444374	0.0845609	13.3438	0.306485	0.757609	0.143353	12.8085	1.00134	0.279802	17.613	23.1277	32.1451		420	Saline	2018-11-07	19:50:00	6.66667	6	0.400751
Inc1 2.1	29.3144	1.2766	28.8659	0.448474	0.0845462	5.14388	0.299773	0.364993	0.145224	13.2551	1.00031	5.61169	14.0931	94.408	31.5	0.0252319	360	Seepage	2018-11-07	13:15:00	0	0	0.400751
Inc1 2.2	55.8093	1.30522	54.8033	1.00607	0.0827718	9.00752	0.297727	0.49063	0.144595	22.1034	0.984358	6.08417	18.3591	132.109	29	0.0567718	360	Seepage	2018-11-07	14:15:00	1	1	0.400751
Inc1 2.3	72.6789	1.3832	71.3653	1.31356	0.0819911	10.8507	0.300049	0.514187	0.14448	27.7597	0.978609	6.57701	21.1027	162.45	25.1294	0.105603	360	Seepage	2018-11-07	15:20:00	2.08333	2	0.400751
Inc1 2.4	100.144	1.28885	98.642	1.50216	0.0815843	12.4931	0.303874	0.522039	0.144442	33.2176	0.976426	7.89574	23.9313	215.764	24.2943	0.116139	360	Seepage	2018-11-07	16:20:00	3.16667	3	0.400751
Inc1 2.5	100.762	1.28959	99.3091	1.45296	0.081685	14.2772	0.309829	0.561301	0.144254	32.4403	0.976534	6.95579	25.4359	204.951	24.1021	0.118564	360	Seepage	2018-11-07	17:15:00	4.08333	4	0.400751
Inc1 2.6	104.897	1.29497	103.424	1.47346	0.0816426	14.2654	0.309784	0.522039	0.144442	33.1514	0.976433	7.25	27.3262	228.264	24.1021	0.118564	360	Seepage	2018-11-07	18:15:00	5.08333	5	0.400751
Inc1 2.7	108.596	1.30039	107.204	1.39146	0.0818163	14.9389	0.312494	0.506335	0.144518	34.0115	0.976386	7.17619	29.5039	243.978	24.0381	0.119371	360	Seepage	2018-11-07	19:50:00	6.66667	6	0.400751
Inc1 3.1	25.4547	1.28257	25.0923	0.362375	0.08486	5.15569	0.299752	0.474925	0.144672	12.2958	1.00254	4.86691	10.8558	64.453	31	0.0443894	380	Seepage	2018-11-07	13:15:00	0	0	0.400751
Inc1 3.2	55.4766	1.30413	54.5976	0.878968	0.0831362	4.03323	0.302077	0.482778	0.144633	20.4164	0.986752	13.5369	8.35422	123.266	29	0.079901	380	Seepage	2018-11-07	14:15:00	1	1	0.400751
Inc1 3.3	77.5225	1.41309	76.2827	1.23976	0.0821653	5.10843	0.299834	0.396402	0.145064	27.5447	0.978762	14.9327	12.887	208.452	25.7744	0.137174	380	Seepage	2018-11-07	15:20:00	2.08333	2	0.400751
Inc1 3.4	100.658	1.28947	99.1677	1.48986	0.0816091	5.29748	0.299513	0.459221	0.14475	32.2418	0.976572	18.7198	11.5358	230.728	24.4867	0.160039	380	Seepage	2018-11-07	16:20:00	3.16667	3	0.400751
Inc1 3.5	111.704	1.30537	110.063	1.64156	0.0813193	8.57035	0.297488	0.569153	0.144216	35.2684	0.976466	12.8423	15.0581	211.322	23.3992	0.179348	380	Seepage	2018-11-07	17:15:00	4.08333	4	0.400751
Inc1 3.6	119.253	1.31908	117.545	1.70716	0.0812053	9.32653	0.297977	0.545596	0.144329	36.0292	0.976601	12.6033	17.0942	235.667	23.1442	0.183874	380	Seepage	2018-11-07	18:15:00	5.08333	5	0.400751
Inc1 3.7	115.193	1.31142	113.597	1.59646	0.0814017	8.73576	0.297564	0.482778	0.144633	35.1857	0.976456	13.0036	18.0948	256.7	22.1282	0.201915	380	Seepage	2018-11-07	19:50:00	6.66667	6	0.400751
Inc1 4.1	0.943743	0.564441	0.819164	0.124579	0.0857799	1.77649	0.309018	0.325731	0.145426	5.69676	1.0204	0.461115	5.45385	8.35116	33		500	Saline	2018-11-07	13:15:00	0	0	0.400751
Inc1 4.2	5.0282	0.543299	4.84623	0.181978	0.0855508	2.14277	0.307691	0.364993	0.145224	6.82141	1.01705	2.26167	5.87071	19.6469	32.5		500	Saline	2018-11-07	14:15:00	1	1	0.400751
Inc1 4.3	6.40393	0.539406	6.21376	0.190178	0.0855184	2.56812	0.306246	0.341436	0.145345	7.44989	1.01523	2.41957	7.52154	26.2774	32.1451		500	Saline	2018-11-07	15:20:00	2.08333	2	0.400751
Inc1 4.4	9.66809	0.536994	9.40411	0.263977	0.0852313	3.088	0.304622	0.396402	0.145064	8.67377	1.0118	3.04537	7.79007	32.1797	32.1451		500	Saline	2018-11-07	16:20:00	3.16667	3	0.400751
Inc1 4.5	10.6849	0.538221	10.3923	0.292676	0.0851216	3.27704	0.304071	0.372845	0.145183	8.97147	1.01099	3.17123	8.7893	37.4471	32.2118		500	Saline	2018-11-07	17:15:00	4.08333	4	0.400751
Inc1 4.6	5.93824	0.540536	5.75216	0.186078	0.0855346	2.89895	0.305194	0.435664	0.144867	7.86336	1.01406	1.98422	6.6541	20.2844	32.1451		500	Saline	2018-11-07	18:15:00	5.08333	5	0.400751
Inc1 4.7	9.01013	0.5367	8.72155	0.288576	0.0851372	2.94621	0.305049	0.435664	0.144867	8.75647	1.01158	2.96026	6.76258	27.444	32.1451		500	Saline	2018-11-07	19:50:00	6.66667	6	0.400751
Inc2 1.1	2.89198	0.552619	2.47631	0.415675	0.0846645	2.85169	0.305341	0.757609	0.143353	7.25142	1.0158	0.868364	3.76406	7.58131	32.9474		330	Saline	2018-11-10	13:30:00	0	0	0.400751
Inc2 1.2	5.1692	0.542823	4.79042	0.378775	0.0847995	4.68308	0.300637	0.836133	0.143012	8.98801	1.01095	1.02292	5.60088	11.7832	32.7465		330	Saline	2018-11-10	14:30:00	1	1	0.400751
Inc2 1.3	5.10084	0.543052	4.75076	0.350076	0.0849057	2.5563	0.306285	0.62412	0.143958	8.65723	1.01185	1.85845	4.09586	12.2687	32.5458		330	Saline	2018-11-10	15:30:00	2	2	0.400751
Inc2 1.4	5.25892	0.542529	4.88014	0.378775	0.0847995	2.20184	0.307484	0.616267	0.143995	8.83916	1.01135	2.21639	3.57287	12.1064	32.6127		330	Saline	2018-11-10	16:30:00	3	3	0.400751
Inc2 1.5	5.27173	0.542488	4.95036	0.321376	0.0850131	2.65083	0.305977	0.639824	0.143885	9.12032	1.01059	1.86748	4.14306	12.3824	32.6796		330	Saline	2018-11-10	17:30:00	4	4	0.400751
Inc2 1.6	5.28882	0.542433	4.95925	0.329576	0.0849823	4.624	0.300758	0.914656	0.142683	9.25263	1.01023	1.0725	5.05545	10.8378	32.5458		330	Saline	2018-11-10	18:30:00	5	5	0.400751
Inc2 1.7	5.37855	0.542149	5.06127	0.317276	0.0850285	3.34794	0.303869	0.718348	0.143528	9.4511	1.0097	1.51176	4.66061	12.148	32.6127		330	Saline	2018-11-10	20:30:00	7	7	0.400751
Inc2 2.1	3.38331	0.55013	3.03734	0.345976	0.084921	2.9344	0.305085	0.608415	0.144031	8.62415	1.01194	1.03508	4.82302	10.3839	32.8804		350	Saline	2018-11-10	13:30:00	0	0	0.400751
Inc2 2.2	3.49012	0.549616	3.23845	0.251677	0.0852786	3.74966	0.302784	0.584858	0.144142	6.6064	1.01768	0.863664	6.41123	12.3787	32.8804		350	Saline	2018-11-10	14:30:00	1	1	0.400751
Inc2 2.3	4.51978	0.545161	4.16151	0.358275	0.0848752	4.90757	0.3002	0.663381	0.143777	10.675	1.00652	0.847977	7.39781	14.2111	32.6127		350	Saline	2018-11-10	15:30:00	2	2	0.400751
Inc2 2.4	4.7505	0.544288	4.35942	0.391075	0.0847543	6.33724	0.298142	0.851837	0.142945	10.7246	1.00639	0.687906	7.43949	13.0163	32.6796		350	Saline	2018-11-10	16:30:00	3	3	0.400751
Inc2 2.5	4.89149	0.543778	4.50861	0.382875	0.0847844	4.38769	0.30126	0.741905	0.143422	11.3035	1.00495	1.02756	5.91409	12.5072	32.6127		350	Saline	2018-11-10	17:30:00	4	4	0.400751
Inc2 2.6	5.38709	0.542122	4.96732	0.419775	0.0846497	5.2384	0.299611	0.686938	0.143669	11.8493	1.00361	0.94825	7.62572	15.4679	32.6127		350	Saline	2018-11-10	18:30:00	5	5	0.400751
Inc2 2.7	4.97694	0.543477	4.56946	0.407475	0.0846944	7.32973	0.297464	0.734052	0.143457	14.1482	0.998327	0.623415	9.9853	16.7654	32.5458		350	Saline	2018-11-10	20:30:00	7	7	0.400751
Inc2 3.1	2.9048	0.552552	2.53832	0.366475	0.0848448	1.54018	0.309914	0.671234	0.143741	8.773	1.01153	1.64807	2.29455	6.6221	32.9474		275	Saline	2018-11-10	13:30:00	0	0	0.400751
Inc2 3.2	3.39186	0.550089	3.00078	0.391075	0.0847543	0.949409	0.312289	0.639824	0.143885	8.83916	1.01135	3.16068	1.48386	6.78509	32.8804		275	Saline	2018-11-10	14:30:00	1	1	0.400751
Inc2 3.3	2.4391	0.555091	2.15462	0.284476	0.0851528	1.76467	0.309062	0.616267	0.143995	5.25021	1.02177	1.22098	2.86349	6.82135	32.6796		275	Saline	2018-11-10	15:30:00	2	2	0.400751
Inc2 3.4	3.83619	0.548017	3.42462	0.411575	0.0846794	1.90646	0.308538	0.631972	0.143921	8.34299	1.01271	1.79633	3.01668	9.08687	32.6796		275	Saline	2018-11-10	16:30:00	3	3	0.400751
Inc2 3.5	3.90882	0.547695	3.51775	0.391075	0.0847543	1.67015	0.309417	0.663381	0.143777	8.37607	1.01262	2.10625	2.51763	8.4099	32.7465		275	Saline	2018-11-10	17:30:00	4	4	0.400751
Inc2 3.6	3.87464	0.547846	3.51637	0.358275	0.0848752	3.66695	0.303	0.584858	0.144142	7.44989	1.01523	0.958934	6.26982	12.8947	32.6796		275	Saline	2018-11-10	18:30:00	5	5	0.400751
Inc2 3.7	5.48536	0.541819	5.10658	0.378775	0.0847995	2.0955	0.307858	0.663381	0.143777	9.13686	1.01054	2.43692	3.15882	11.4276	32.6127		275	Saline	2018-11-10	20:30:00	7	7	0.400751
Inc2 4.1	2.96461	0.552238	2.52024	0.444374	0.0845609	1.43384	0.310327	0.647677	0.143849	7.84682	1.0141	1.75768	2.21382	6.79112	32.9474		365	Saline	2018-11-10	13:30:00	0	0	0.400751
Inc2 4.2	3.23805	0.550845	2.76907	0.468974	0.0844731	1.33932	0.3107	0.631972	0.143921	8.06183	1.0135	2.06753	2.11927	7.24299	32.8804		365	Saline	2018-11-10	14:30:00	1	1	0.400751
Inc2 4.3	3.21241	0.550973	2.59584	0.616572	0.0839638	1.59926	0.309687	0.749757	0.143388	7.83028	1.01415	1.62316	2.13303	6.41764	32.6796		365	Saline	2018-11-10	15:30:00	2	2	0.400751
Inc2 4.4	3.51576	0.549494	3.02218	0.493574	0.084386	1.45747	0.310235	0.647677	0.143849	8.11145	1.01336	2.07358	2.25031	7.67857	32.6796		365	Saline	2018-11-10	16:30:00	3	3	0.400751
Inc2 4.5	3.6952	0.548657	3.09093	0.604272	0.0840051	1.54018	0.309914	0.694791	0.143634	8.12798	1.01331	2.00686	2.21675	7.53519	32.6796		365	Saline	2018-11-10	17:30:00	4	4	0.400751
Inc2 4.6	3.60975	0.549052	3.28428	0.325476	0.0849977	3.00529	0.30487	0.529892	0.144404	7.16872	1.01604	1.09283	5.67152	12.4838	32.6127		365	Saline	2018-11-10	18:30:00	5	5	0.400751
Inc2 4.7	3.87892	0.547827	3.52474	0.354176	0.0848904	2.35544	0.306956	0.577006	0.144179	8.50838	1.01226	1.49642	4.08218	10.8047	32.6127		365	Saline	2018-11-10	20:30:00	7	7	0.400751
Inc3 1.1	11.689	0.540348	10.9125	0.77647	0.0834475	2.35544	0.306956	0.396402	0.145064	10.8511	0.736494	4.63288	5.94206	35.4297	31.7451	0.0240379	270	Seepage	2018-11-11	10:00:00	0	0	0.400751
Inc3 1.2	27.9216	1.27846	25.9521	1.96955	0.0808178	7.32973	0.297464	0.59271	0.144105	14.7626	0.729857	3.54066	12.3665	59.4749	30.0868	0.0467518	270	Seepage	2018-11-11	11:00:00	1	1	0.400751
Inc3 1.3	40.613	1.274	38.8484	1.76456	0.0811111	6.47902	0.298008	0.404254	0.145024	18.594	0.724495	5.99603	16.0271	116.491	29.1641	0.0593906	270	Seepage	2018-11-11	12:00:00	2	2	0.400751
Inc3 1.4	51.8166	1.29325	49.5764	2.24015	0.0805345	11.5124	0.301394	0.529892	0.144404	21.3192	0.721383	4.30635	21.7259	119.513	28.0494	0.074659	270	Seepage	2018-11-11	13:00:00	3	3	0.400751
Inc3 1.5	61.2091	1.3255	58.4114	2.79774	0.0803276	10.3781	0.299253	0.561301	0.144254	24.0284	0.718874	5.62833	18.4894	127.538	27.0711	0.088059	270	Seepage	2018-11-11	14:00:00	4	4	0.400751
Inc3 1.6	66.8085	1.35128	63.5598	3.24874	0.0805334	12.2568	0.303224	1.55069	0.140441	27.9913	0.978449	5.18569	7.90404	50.987	26.5513	0.0951779	270	Seepage	2018-11-11	15:00:00	5	5	0.400751
Inc3 1.7	78.6585	1.42054	75.0859	3.57263	0.0808859	11.9259	0.30237	0.631972	0.143921	30.9021	0.976946	6.29602	18.871	143.336	25.5161	0.109357	270	Seepage	2018-11-11	16:00:00	6	6	0.400751
Inc3 1.8	98.6611	1.28714	94.5883	4.07282	0.0817604	10.5553	0.299535	0.781166	0.14325	35.103	0.976446	8.96118	13.5123	139.812	24.0381	0.129603	270	Seepage	2018-11-11	17:45:00	7.75	7	0.400751
Inc3 2.1	3.81056	0.548132	3.41948	0.391075	0.0847543			0.412107	0.144985	8.49184	1.0123		0	9.24653	32.3453	0.020129	170	Seepage	2018-11-11	10:00:00	0	0	0.400751
Inc3 2.2	26.1772	1.28126	25.3146	0.862568	0.083185	2.06006	0.307984	0.278617	0.145672	16.2321	0.994015	12.2883	7.39386	101.348	30.5497	0.0514316	170	Seepage	2018-11-11	11:00:00	1	1	0.400751
Inc3 2.3	44.8007	1.27868	43.647	1.15366	0.0823791	3.51335	0.303411	0.325731	0.145426	22.2523	0.984162	12.4232	10.7861	148.325	28.7699	0.0824591	170	Seepage	2018-11-11	12:00:00	2	2	0.400751
Inc3 2.4	64.8739	1.34184	63.4456	1.42836	0.0817369	4.45859	0.301106	0.380697	0.145143	29.0828	0.977775	14.23	11.7116	182.12	26.941	0.114343	170	Seepage	2018-11-11	13:00:00	3	3	0.400751
Inc3 2.5	89.4397	1.44071	87.8145	1.62516	0.0813489	5.35656	0.299417	0.35714	0.145264	34.7226	0.97641	16.3938	14.9985	265.431	25.5161	0.139182	170	Seepage	2018-11-11	14:00:00	4	4	0.400751
Inc3 2.6	98.0242	1.50152	96.2842	1.73996	0.0811508	6.33724	0.298142	0.372845	0.145183	32.6451	1.1262	15.1934	16.997	279.906	24.3584	0.159365	170	Seepage	2018-11-11	15:00:00	5	5	0.400751
Inc3 2.7	118.625	1.64	117.09	1.53496	0.0815192	6.34905	0.298131	0.38855	0.145104	34.4622	1.12608	18.4421	16.3404	321.643	23.0169	0.182751	170	Seepage	2018-11-11	16:00:00	6	6	0.400751
Inc3 2.8	137.277	1.80144	136.021	1.25616	0.0821259	7.14068	0.297546	0.419959	0.144945	38.9313	1.12759	19.0487	17.0033	343.886	20.4899	0.226805	170	Seepage	2018-11-11	17:45:00	7.75	7	0.400751
Inc3 3.1	8.98449	0.536697	8.26542	0.71907	0.0836286	0.665839	0.313497	0.396402	0.145064	9.00657	1.16587	12.4135	1.67971	24.3448	32.0116	0.0195487	225	Seepage	2018-11-11	10:00:00	0	0	0.400751
Inc3 3.2	34.7949	1.27256	32.9525	1.84245	0.0809917	1.87101	0.308668	0.953918	0.142522	14.4415	1.15064	17.6121	1.9614	38.4372	29.6908	0.0500313	225	Seepage	2018-11-11	11:00:00	1	1	0.400751
Inc3 3.3	41.6777	1.2749	39.3884	2.28935	0.0804958	2.88714	0.305231	0.435664	0.144867	14.5724	1.15032	13.6427	6.62698	102.292	28.2456	0.0690131	225	Seepage	2018-11-11	12:00:00	2	2	0.400751
Inc3 3.4	65.0213	1.34254	62.0349	2.98634	0.0803732	2.98166	0.304941	0.459221	0.14475	21.2842	1.13656	20.8055	6.49287	148.083	27.006	0.0852945	225	Seepage	2018-11-11	13:00:00	3	3	0.400751
Inc3 3.5	75.8065	1.40215	72.4143	3.39223	0.0806686	3.15889	0.304413	0.514187	0.14448	24.6565	1.13176	22.924	6.14347	153.573	25.7098	0.10232	225	Seepage	2018-11-11	14:00:00	4	4	0.400751
Inc3 3.6	91.1889	1.27991	87.6491	3.53983	0.0808425	3.50154	0.303443	0.498482	0.144557	26.2116	1.13004	25.0316	7.0244	189.958	24.9364	0.112478	225	Seepage	2018-11-11	15:00:00	5	5	0.400751
Inc3 3.7	105.107	1.29527	101.673	3.43323	0.0807134	3.3952	0.303737	0.537744	0.144367	28.4216	1.12812	29.9462	6.31378	201.772	23.8462	0.126797	225	Seepage	2018-11-11	16:00:00	6	6	0.400751
Inc3 3.8	115.564	1.31209	112.135	3.42913	0.0807088	2.49723	0.30648	0.537744	0.144367	31.2209	1.12659	44.9037	4.6439	219.549	21.8119	0.153516	225	Seepage	2018-11-11	17:45:00	7.75	7	0.400751
Inc3 4.1	2.20412	0.556441	1.86224	0.341876	0.0849363			0.451368	0.144788	7.87703	1.16947		0	4.88319	32.2118	0	300	Seepage	2018-11-11	10:00:00	0	0	0.400751	Short core, remove this as outlier
Inc3 4.2	2.84071	0.55289	2.48653	0.354176	0.0848904			0.412107	0.144985	8.20443	1.16841		0	6.89314	32.6127	0	300	Seepage	2018-11-11	11:00:00	1	1	0.400751	Short core, remove this as outlier
Inc3 4.3	6.08777	0.540152	5.7623	0.325476	0.0849977			0.412107	0.144985	8.56457	1.16726		0	14.7723	32.2786	0	300	Seepage	2018-11-11	12:00:00	2	2	0.400751	Short core, remove this as outlier
Inc3 4.4	16.974	0.565956	16.4435	0.530473	0.0842571			0.443516	0.144827	10.7582	1.16058		0	38.2714	31.7451	0	300	Seepage	2018-11-11	13:00:00	3	3	0.400751	Short core, remove this as outlier
Inc3 4.5	18.4522	0.577164	18.135	0.317276	0.0850285			0.891099	0.14278	10.4635	1.16144		0	20.7073	31.1465	0	300	Seepage	2018-11-11	14:00:00	4	4	0.400751	Short core, remove this as outlier
Inc3 4.6	27.9216	1.27846	27.5511	0.370575	0.0848297			0.404254	0.145024	11.7076	1.15786		0	69.0695	30.5498	0	300	Seepage	2018-11-11	15:00:00	5	5	0.400751	Short core, remove this as outlier
Inc3 4.7	32.9459	1.27334	32.6491	0.296776	0.085106			0.380697	0.145143	12.4607	1.15578		0	86.5409	29.8887	0	300	Seepage	2018-11-11	16:00:00	6	6	0.400751	Short core, remove this as outlier
Inc3 4.8	39.0682	1.27304	38.7919	0.276277	0.0851841			0.364993	0.145224	13.5247	1.15296		0	107.038	29.4273	0	300	Seepage	2018-11-11	17:45:00	7.75	7	0.400751	Short core, remove this as outlier

## Sheet: IncubationCalculation
Incubation Flux from Freshwater Discharge Tube
Inc ID	Overlying Water (dm)	Type	NO3 Flux (µmol/m²/day)	NO2 Flux (µmol/m²/day)	NH4 Flux (µmol/m²/day)	PO4 Flux (µmol/m²/day)	DSi Flux (µmol/m2/day)	FreshWater flux (L/day)	FreshWater flux (cm/day)		Seepage Zone size
Inc1-2	1.1132	FDT	56976.3	871.354	4724.63	NA	18536.3	0.0621466	15.5075		2100	assuming coastline length of 420 m (after the springs) and a 5 m wide FDT visually observed in the field
Inc1-3	1.05461	FDT	52634	777.714	NA	NA	14178.3	0.327322	81.6774		420	length of the seepage zone (distance between springs)
Inc3-1	1.48426	FDT	36489	1431.7	5402.45	95.104	11177.2	0.314082	78.3735
Inc3-2	2.35736	FDT	98711.4	1504.43	4181.1	NA	36951.5	0.632398	157.803
Inc3-3	1.78111	FDT	58073.8	2375.51	4747.66	NA	12476.1	0.393233	98.1241
Average			60576.9	1392.14	4763.96	95.104	18663.9	0.333987	83.3404
Stdev			23004.3	638.344	499.734	#DIV/0!	10593.8
Incubation Flux from Upper Saline Plume
Inc1-1	0.954168	USP	604.35	NA	2963.6	144.218	1996.67
Inc1-4	0.801501	USP	1873.04	38.7759	736.47	31.8797	1567.58
Inc2-1	1.2144	USP	735.869	-38.542	NA	NA	689.668
Inc2-2	1.145	USP	697.73	46.3134	1418.25	NA	55.0068
Inc2-3	1.45727	USP	1192.3	8.81521	NA	NA	NA
Inc2-4	1.09795	USP	384.881	NA	NA	NA	161.251
Average			914.695	13.8406	1706.1	88.0487	894.035
Stdev			538.806	38.4943	1141.13	79.4349	859.094
Fluxes from Coastal Springs
ID Springs	avg Q - Flow Rate (mL/sec)	Q (ml/sec) 1	Q (ml/sec) 2	Q (ml/sec) 3	Q (ml/sec) 4	Q (ml/sec) 5	NO3 µmol/L	NO2 µmol/L	NH4 µmol/L	PO4 µmol/L	Dsi µmol/L	NO3 Flux [mol/day]	NO2 Flux [mol/day]	NH4 Flux [mol/day]	PO4 flux [mol/day]	DSi flux [mol/day]
30.1	385.721	412.088	361.305	390.947	372.96	391.304	356.196	0	2.98212	0	121.809	11.8707	0	0.099383	0	4.05944
30.2	101.595	101.942	103.81	104.428	97.7948	100	306.631	0	0.622621	0	117.962	2.69154	0	0.00546523	0	1.03545
30.3	657.946	687.5	660.793	632.799	668.103	640.535	392.322	0	6.49544	0.082	121.891	22.3022	0	0.369243	0.00466142	6.92908
30.4	214.563	280	257.202	142.672	153.649	239.295	309.569	0	2.12648	0	125.738	5.73888	0	0.0394212	0	2.33096
31.1	2141.63	1789.47	2147.44	1754.39	2424.24	2592.59	437.556	0.381577	174.863	0	112.232	80.9638	0.0706056	32.3561	0	20.7671
31.2	310.668	425.532	271.739	290.323	304.878	260.87	620.769	0.399934	203.022	0.122	124.919	16.6625	0.0107349	5.44946	0.00327469	3.35305
Sum	329367	L/day										140.23	0.0813405	38.3191	0.00793611	38.4751
	329.367	m³/day
Comparison of estimated Fluxes
Total Flux
	NO3 (mol/day)	NO2 (mol/day)	NH4 (mol/day)	PO4 (mmol/day)	DSi (mol/day)	Water flux (m³/day)			Darcy Flux Endmembers (µmol/L)
CSW (mol/day)	140.23	0.0813405	38.3191	7.93611	38.4751	329.367		NO3	241.619
FDT (mol/day)	127.211	2.9235	10.0043	199.718	39.1942	0.140275		NO2	0.150327
Darcy Flux minimum	8.11841	0.00505099	0.886302	31.6216	3.22996	33.6		NH4	26.378
Darcy Flux maximum	199.916	0.124381	21.8252	778.682	79.5376	827.4		PO4	0.941119
								DSi	96.1296
Flux per meter shoreline
	NO3 (mmol/day per m shore)	NO2 (mmol/day per m shore)	NH4 (mmol/day per m shore)	PO4 (mmol/day per m shore)	DSi (mmol/day per m shore)
CSW	333.88	0.193668	91.236	0.0188955	91.6074
FDT	302.885	6.96071	23.8198	0.47552	93.3194
Darcy Flux minimum	19.3295	0.0120262	2.11024	0.0752895	7.69037
Darcy Flux maximum	475.99	0.296145	51.9647	1.854	189.375
